# Supplementary material for: Sirtuin 6 protects against hepatic fibrogenesis by suppressing the YAP and TAZ function
Source: PubMed Central journal article supplement — FASEB J. 2022 Aug 29;36(10):e22529. doi: 10.1096/fj.202200522R (PMC9542050; doi:10.1096/fj.202200522r), 2022-08-29
Supplement: FSB2-36-0-s001.pdf [file FSB2-36-0-s001.pdf]

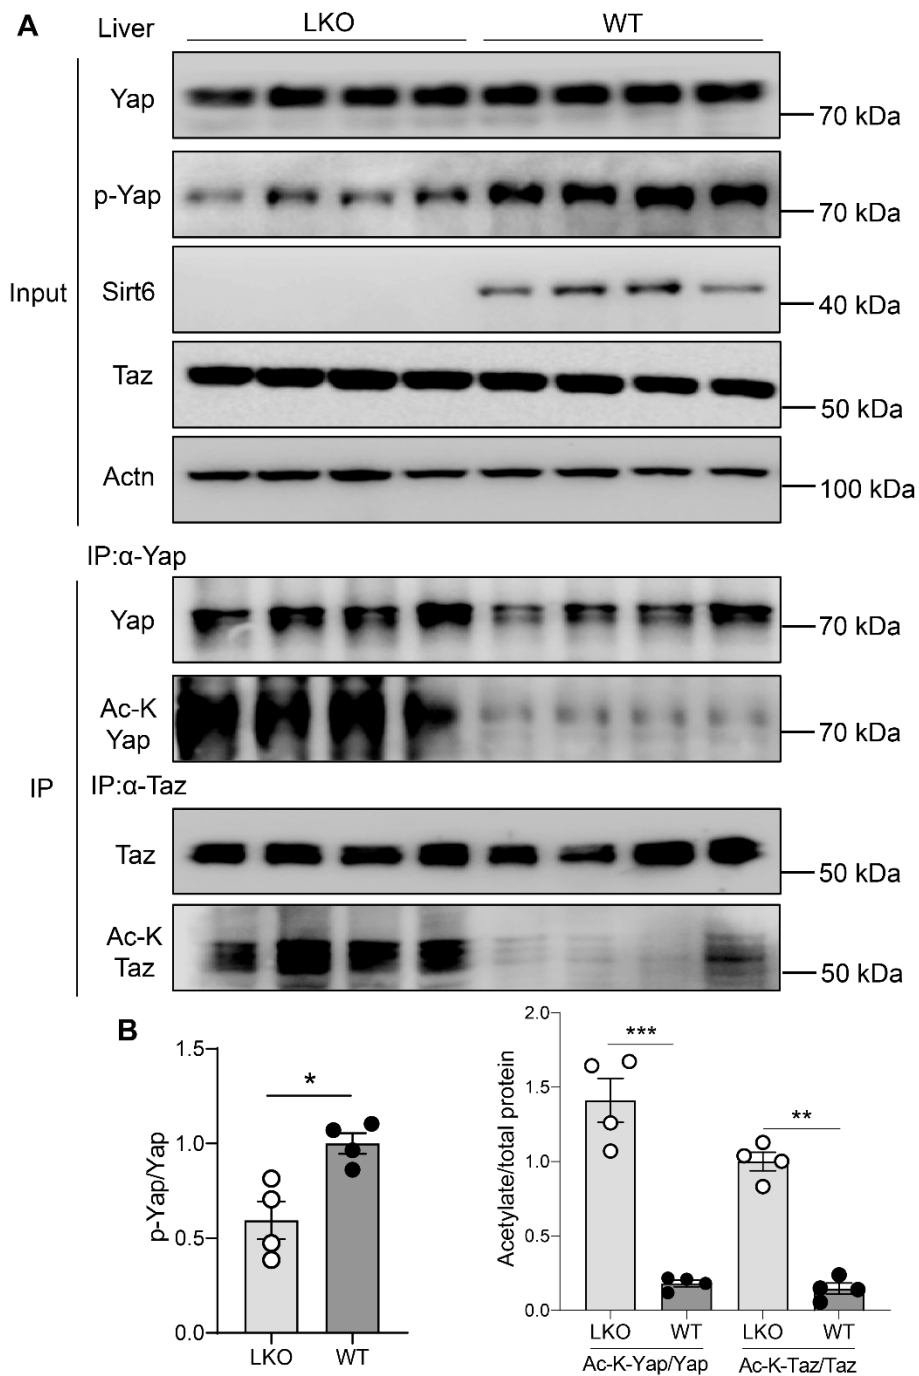

**Supplementary Figure 7. Yap and Taz are highly acetylated in the liver of Sirt6 LKO mice.**

(A, B) Yap and Taz acetylation analysis and quantification in the livers of WT and Sirt6 LKO mice (n=4). Data are presented as mean  $\pm$  SEM. \* $p < 0.05$ , \*\* $p < 0.01$ , and \*\*\* $p < 0.001$ .
