# Supplementary material for: Sirtuin 6 protects against hepatic fibrogenesis by suppressing the YAP and TAZ function
Source: PubMed Central journal article supplement — FASEB J. 2022 Aug 29;36(10):e22529. doi: 10.1096/fj.202200522R (PMC9542050; doi:10.1096/fj.202200522r), 2022-08-29
Supplement: FSB2-36-0-s003.pdf [file FSB2-36-0-s003.pdf]

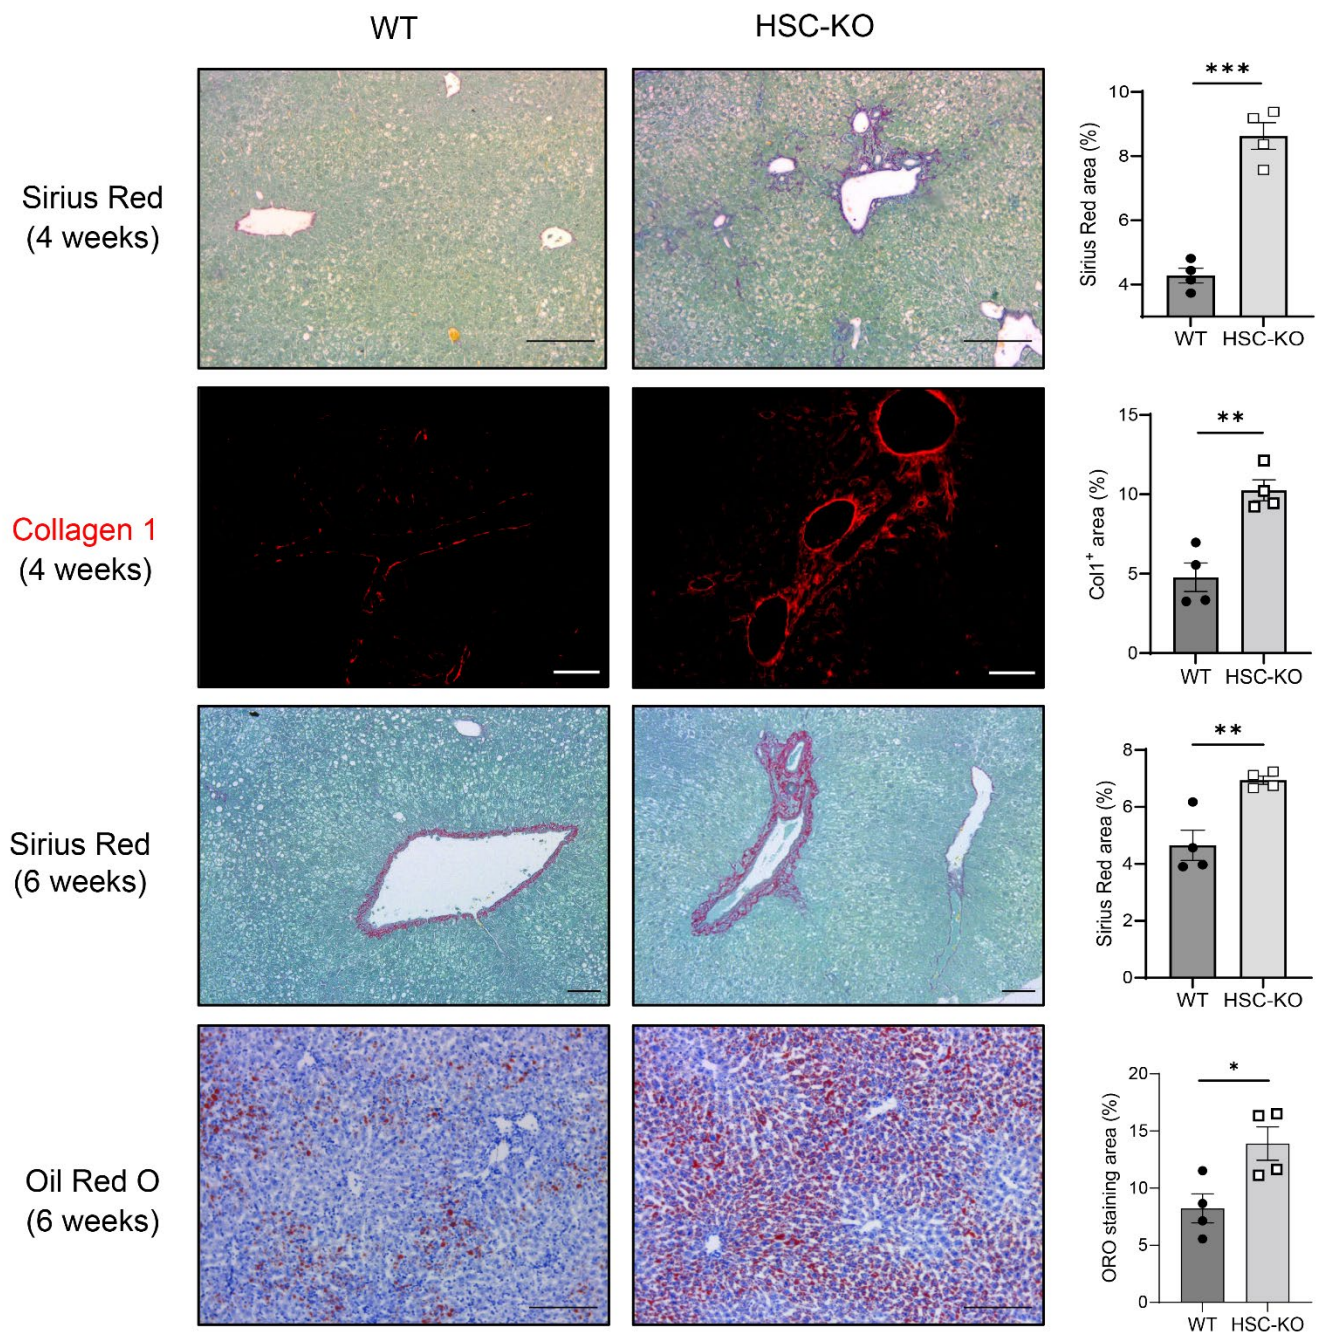

**Supplementary Figure 4. Sirt6 HSC-KO mice develop diet-induced hepatic fibrosis.**

Histological analysis and quantification of hepatic fibrosis and neutral lipid accumulation in the liver sections of WT and Sirt6 HSC-KO mice fed with the HFCC diet for 4 or 6 weeks (n=4). Scale bar = 100  $\mu$ m. Data are presented as mean  $\pm$  SEM. \*p < 0.05, \*\*p < 0.01, and \*\*\*p < 0.001.
