# Supplementary material for: Sirtuin 6 protects against hepatic fibrogenesis by suppressing the YAP and TAZ function
Source: PubMed Central journal article supplement — FASEB J. 2022 Aug 29;36(10):e22529. doi: 10.1096/fj.202200522R (PMC9542050; doi:10.1096/fj.202200522r), 2022-08-29
Supplement: FSB2-36-0-s005.pdf [file FSB2-36-0-s005.pdf]

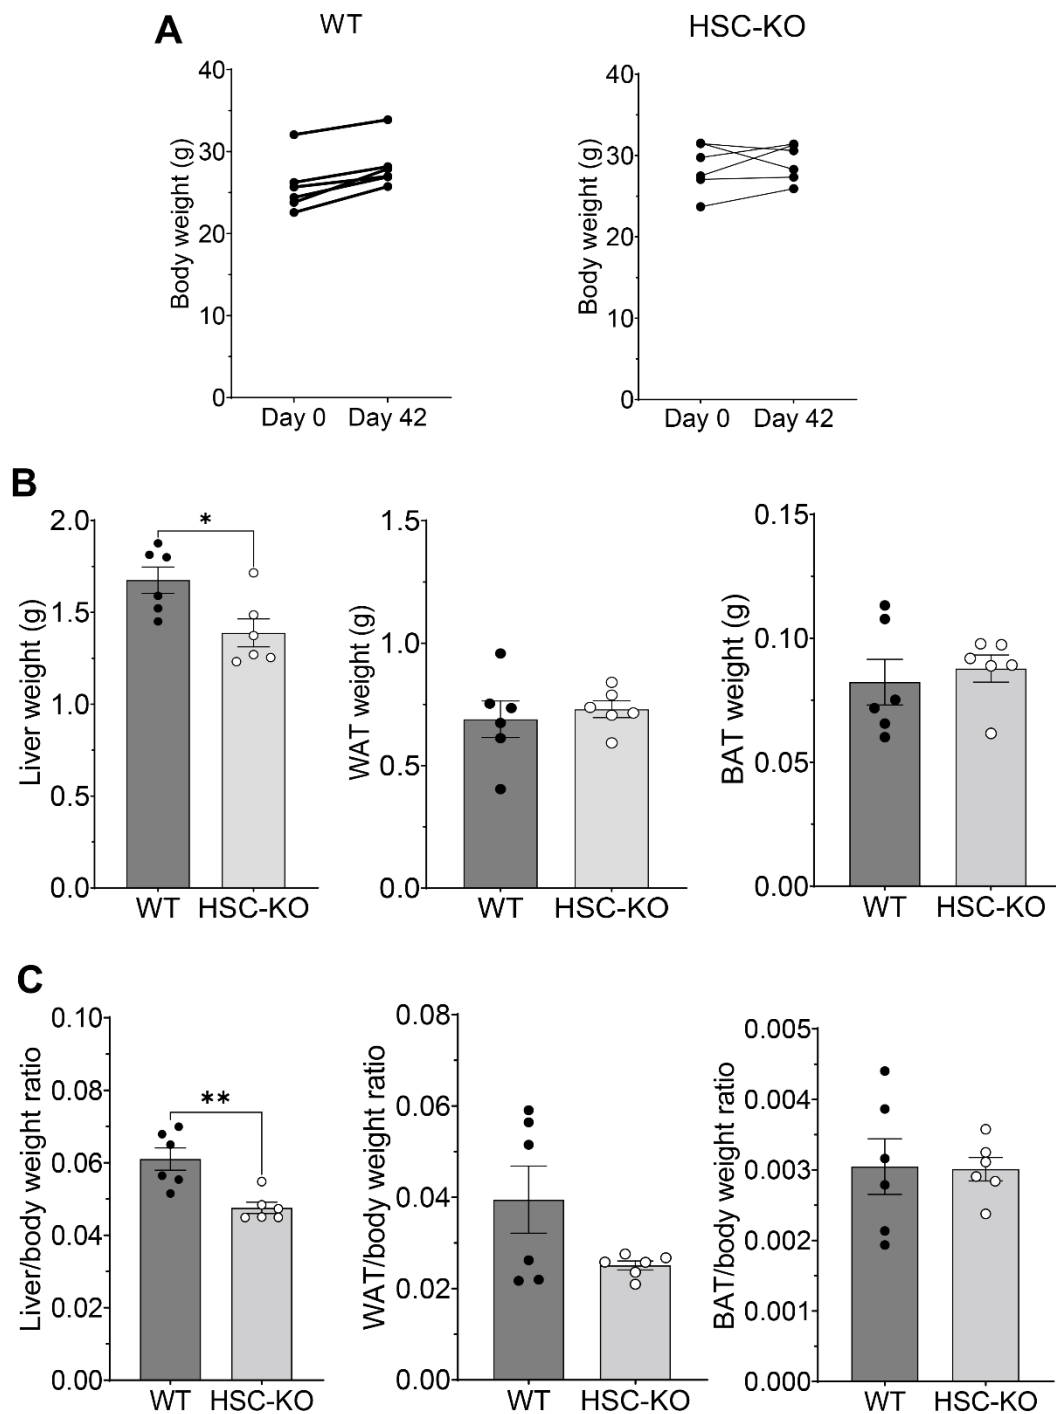

**Supplementary Figure 5. Body and tissue weight measurements in the WT and Sirt6 HSC-KO mice.**

(A) Body weight measurements for WT and Sirt6 HSC-KO mice at the beginning and the end of the HFCC diet treatment. (B) Measurements of liver, white adipose tissue (WAT), and brown adipose tissue (BAT) weights. (C) Liver, WAT, and BAT to body weight ratios. Data are presented as mean  $\pm$  SEM. \* $p < 0.05$  and \*\* $p < 0.01$ .
