# Supplementary material for: Sirtuin 6 protects against hepatic fibrogenesis by suppressing the YAP and TAZ function
Source: PubMed Central journal article supplement — FASEB J. 2022 Aug 29;36(10):e22529. doi: 10.1096/fj.202200522R (PMC9542050; doi:10.1096/fj.202200522r), 2022-08-29
Supplement: FSB2-36-0-s006.pdf [file FSB2-36-0-s006.pdf]

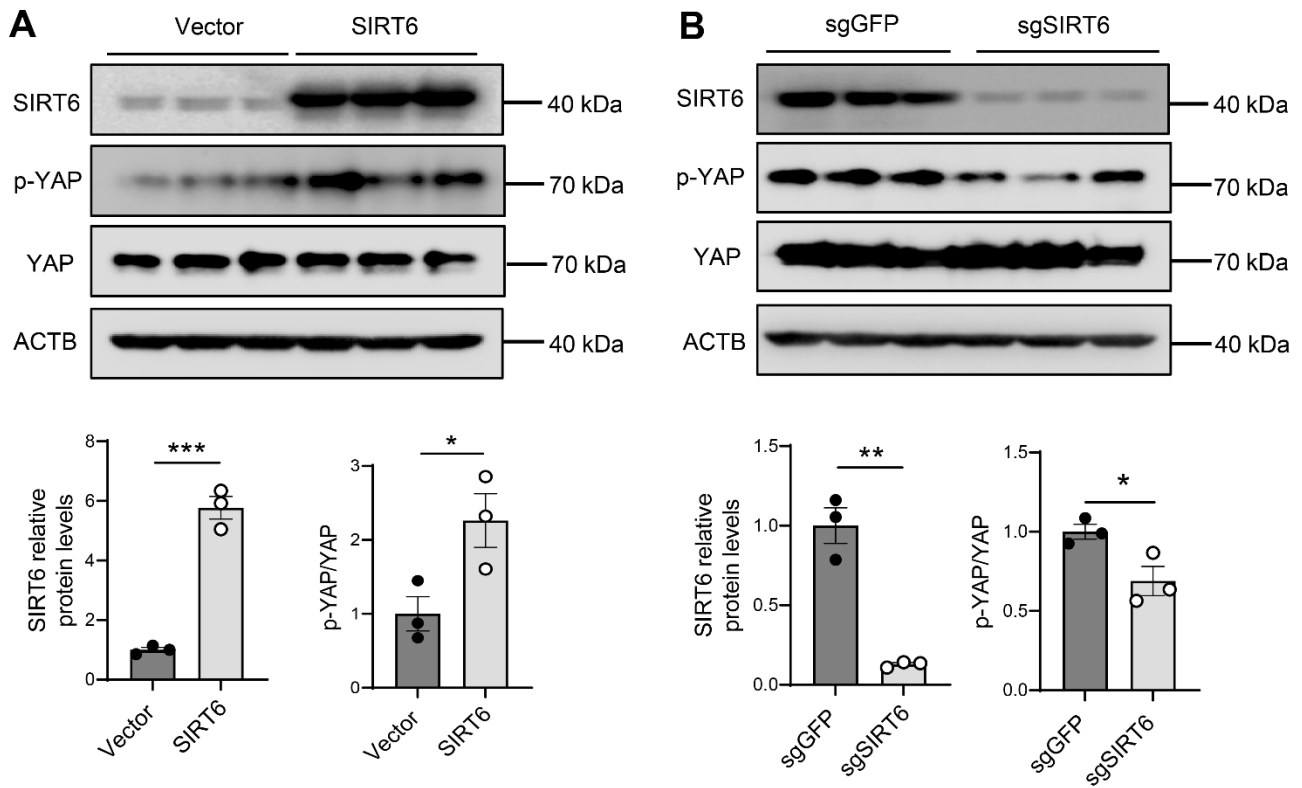

**Supplementary Figure 2. YAP phosphorylation is modulated by SIRT6 in HSCs.**

(A) Immunoblot and quantification analysis of YAP and phosphorylated YAP (Ser127) in LX-2 cells transfected with either vector control or SIRT6 (n=3). Actin beta (ACTB) was used as a loading control.

(B) Immunoblot and quantification analysis of YAP and phosphorylated YAP (Ser127) in LX-2 cells transfected with either sgGFP or sgSIRT6 (n=3). Data are presented as mean ± SEM. \*p < 0.05, \*\*p < 0.01,

and \*\*\*p < 0.001.
