# Supplementary material for: Sirtuin 6 protects against hepatic fibrogenesis by suppressing the YAP and TAZ function
Source: PubMed Central journal article supplement — FASEB J. 2022 Aug 29;36(10):e22529. doi: 10.1096/fj.202200522R (PMC9542050; doi:10.1096/fj.202200522r), 2022-08-29
Supplement: FSB2-36-0-s007.pdf [file FSB2-36-0-s007.pdf]

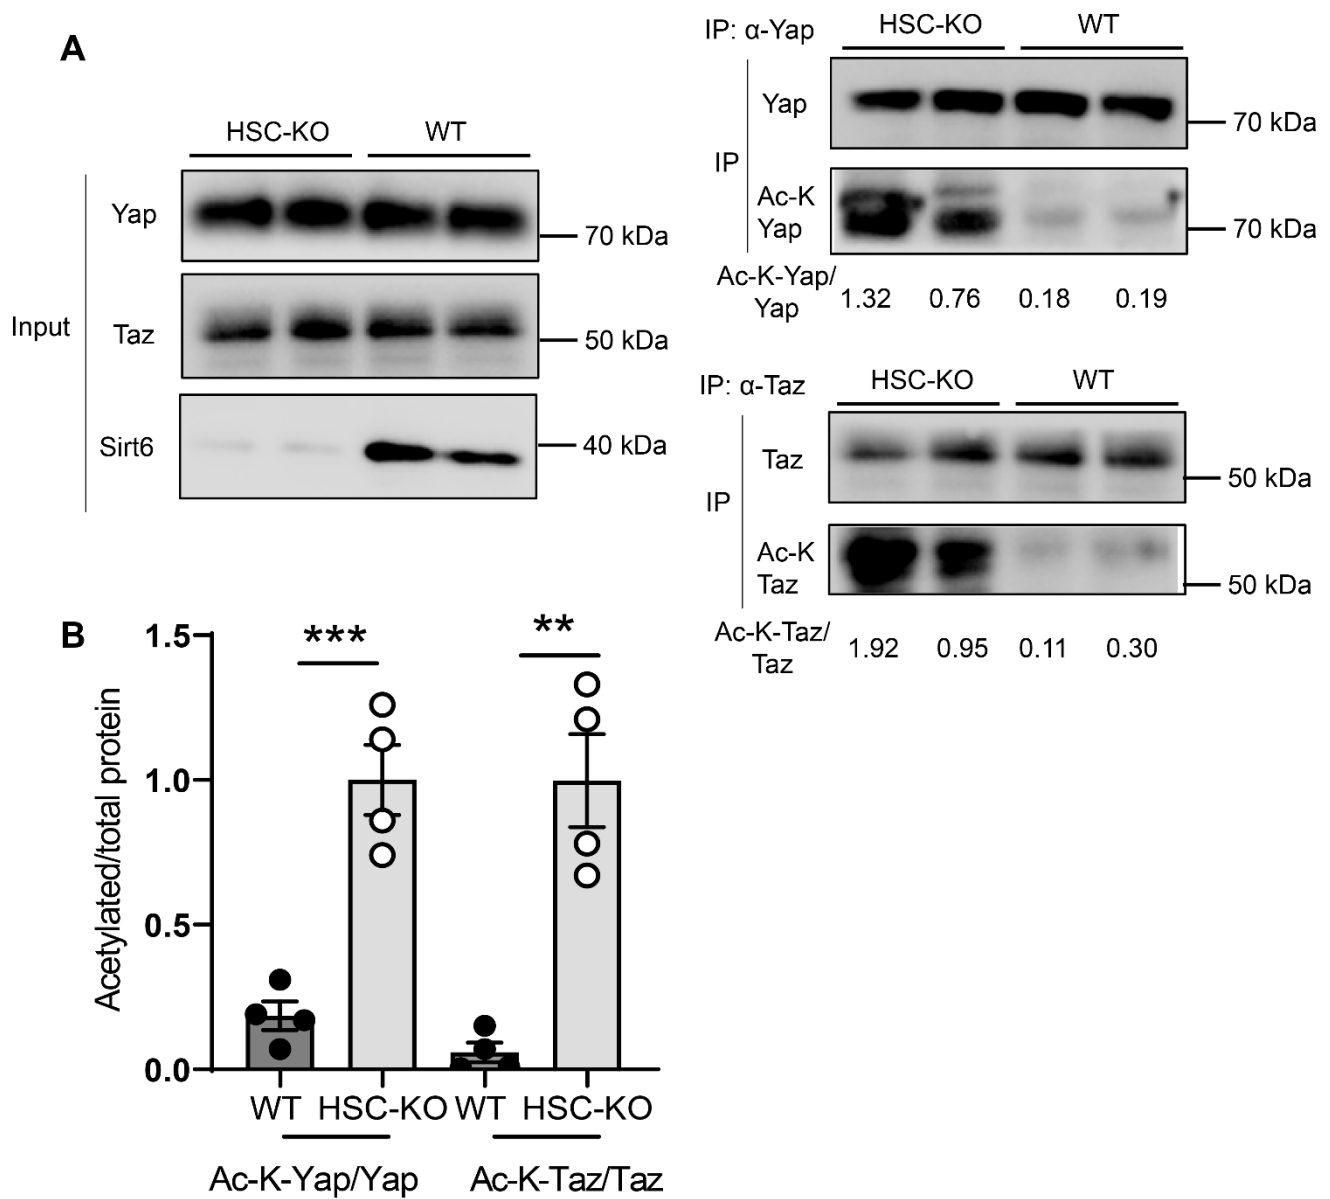

**Supplementary Figure 6. Yap and Taz are hyperacetylated in the primary HSCs of Sirt6 HSC-KO mice.**

(A) Yap and Taz acetylation analysis in the primary HSCs of WT and Sirt6 HSC-KO mice (n=2). (B) Quantitative analysis of Yap and Taz acetylation from Panel A in this figure and Figure 6. Data are presented as mean  $\pm$  SEM. \*\*p < 0.01 and \*\*\*p < 0.001.
