# Supplementary material for: Sirtuin 6 protects against hepatic fibrogenesis by suppressing the YAP and TAZ function
Source: PubMed Central journal article supplement — FASEB J. 2022 Aug 29;36(10):e22529. doi: 10.1096/fj.202200522R (PMC9542050; doi:10.1096/fj.202200522r), 2022-08-29
Supplement: FSB2-36-0-s008.pdf [file FSB2-36-0-s008.pdf]

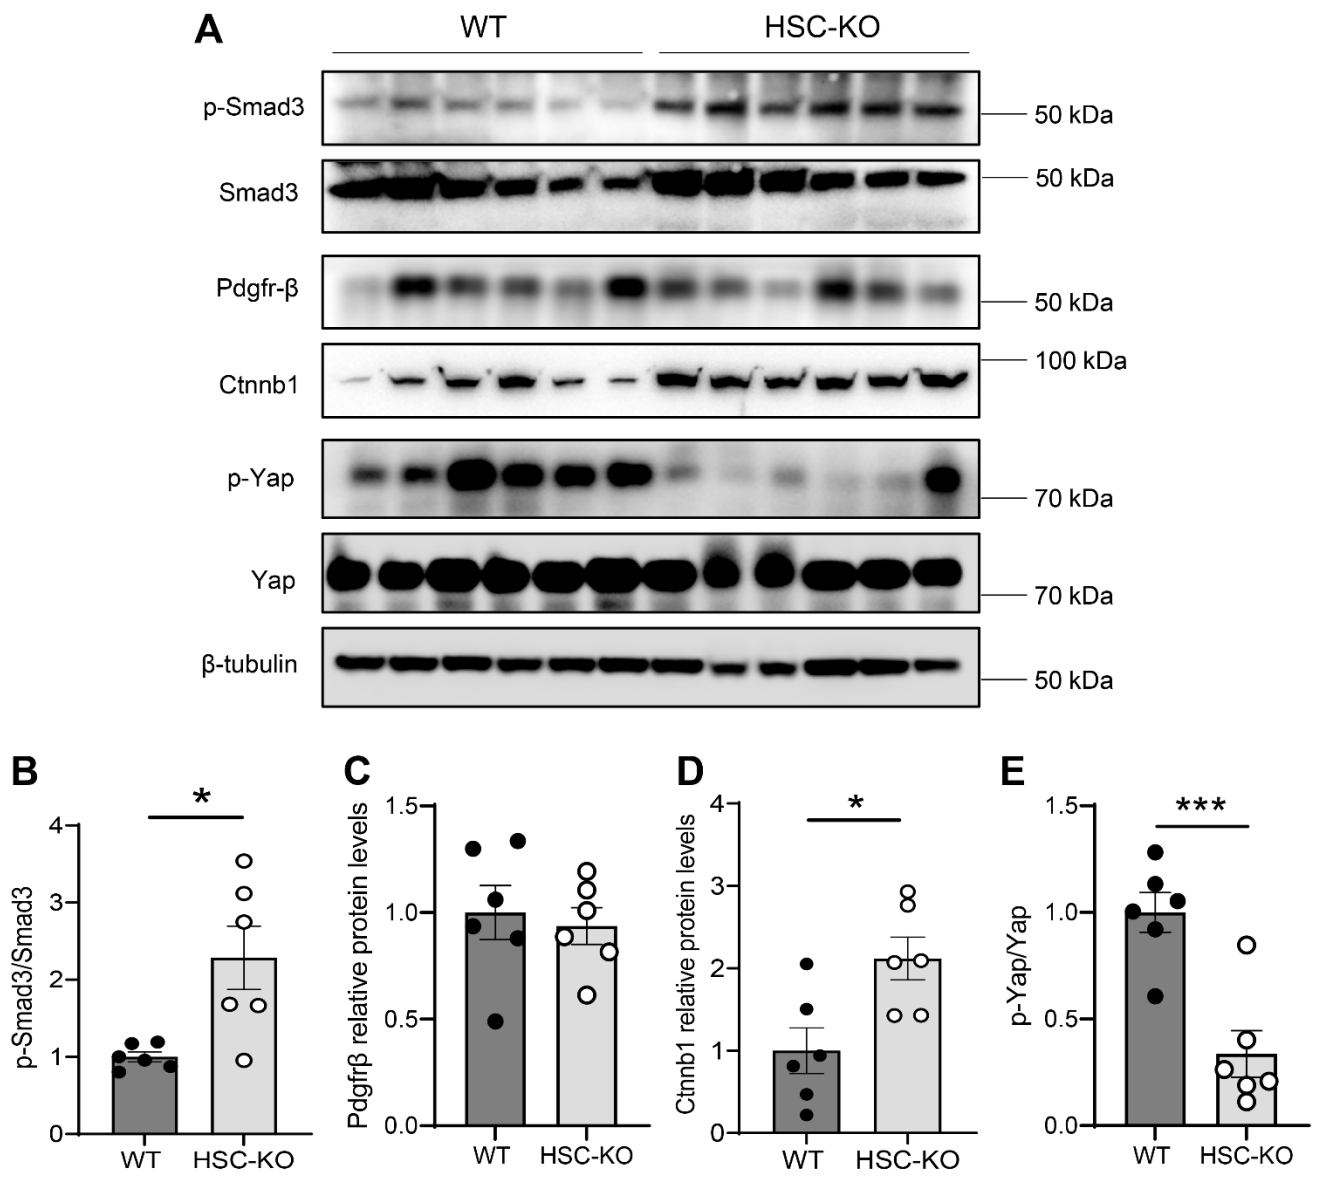

**Supplementary Figure 1. Immunoblot analysis of several fibrosis pathways in the livers of Sirt6 HSC-KO mice.**

(A-E) Immunoblot and quantification analysis of several selected fibrosis pathways in the livers of WT and Sirt6 HSC-KO mice (n= 6/genotype) treated with the HFCC diet for 6 weeks. Data are presented as mean  $\pm$  SEM. \*p < 0.05 and \*\*\*p < 0.001.
