# Supplementary material for: Sirtuin 6 protects against hepatic fibrogenesis by suppressing the YAP and TAZ function
Source: PubMed Central journal article supplement — FASEB J. 2022 Aug 29;36(10):e22529. doi: 10.1096/fj.202200522R (PMC9542050; doi:10.1096/fj.202200522r), 2022-08-29
Supplement: FSB2-36-0-s009.pdf [file FSB2-36-0-s009.pdf]

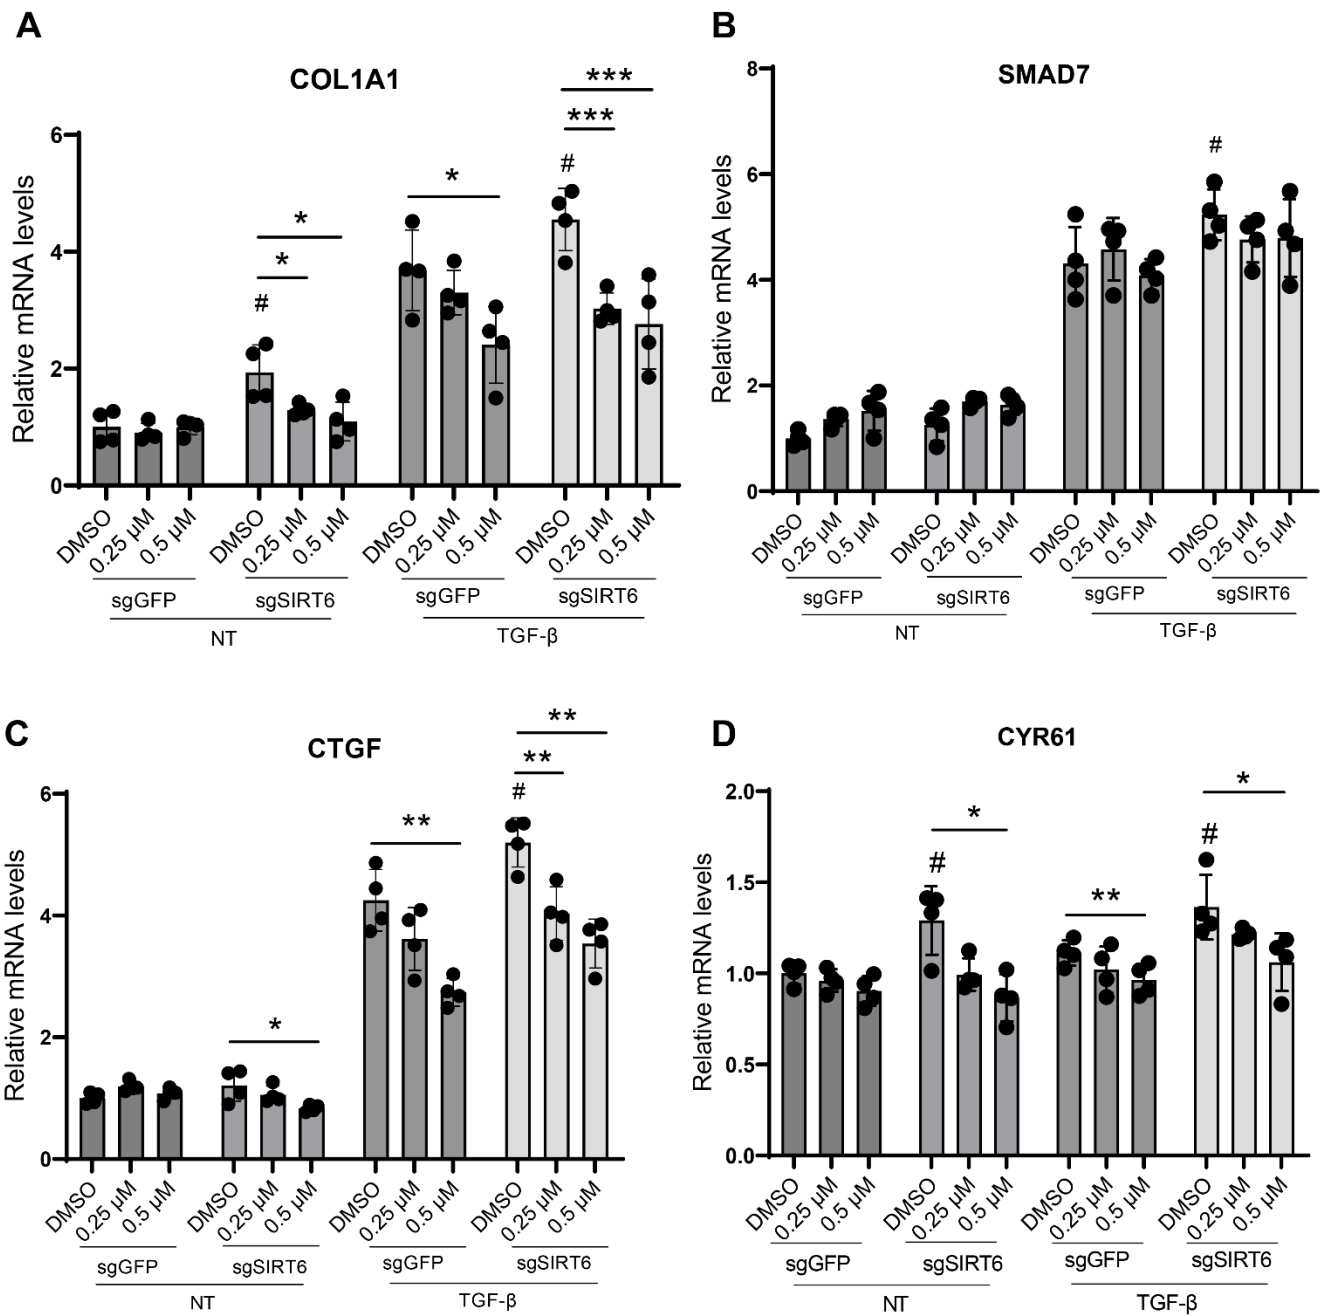

**Supplementary Figure 3. Both SMAD3 and YAP are regulated by SIRT6 in HSCs.**

(A-D) Real-time PCR analysis of *COL1A1*, *SMAD7*, *CTGF*, and *CYR61* mRNAs in the LX-2 cells transfected with either sgGFP or sgSIRT6 plasmids in the presence or absence of 5 ng/ml TGF-β1, DMSO, or 0.25 μM or 0.5 μM verteporfin for 24 hours (n=4). Data are presented as mean ± SEM. \*p < 0.05, \*\*p < 0.01, and \*\*\*p < 0.001 vs. DMSO, and #p < 0.05 for sgSIRT6 vs sgGFP.
